# Supplementary material
Source: HighWire-hosted journal article supplement (http://jmg.bmjjournals.com/highwire/filestream/160599/field_highwire_adjunct_files/0/Supplementary_table_1_v1_0_20111001_2.pdf)
Supplement: Supplementary_table_1_v1_0_20111001_2.pdf [file Supplementary_table_1_v1_0_20111001_2.pdf]

**Supplementary table 1.** Number of liveborn offspring in a sample of adults with 22q11.2 deletion syndrome and their unaffected siblings.

|                                                                   | <b>22q11.2 deletion syndrome</b> |                     |                              |           |           |           |          |         |   |
|-------------------------------------------------------------------|----------------------------------|---------------------|------------------------------|-----------|-----------|-----------|----------|---------|---|
|                                                                   | Total                            | Subjects with child | Number of liveborn offspring |           |           |           |          |         | 5 |
|                                                                   |                                  |                     | 0                            | 1         | 2         | 3         | 4        |         |   |
| n                                                                 | n (%)                            | n (%)               | n (%)                        | n (%)     | n (%)     | n (%)     | n (%)    | n (%)   |   |
| All subjects                                                      | 141                              | 20 (14.2)           | 121 (85.8)                   | 9 (6.4)   | 7 (5.0)   | 2 (1.4)   | 2 (1.4)  | 0 (0.0) |   |
| Males                                                             | 70                               | 4 (5.7)             | 66 (94.3)                    | 1 (1.4)   | 3 (4.3)   | 0 (0.0)   | 0 (0.0)  | 0 (0.0) |   |
| Females                                                           | 71                               | 16 (22.5)           | 55 (77.5)                    | 8 (11.3)  | 4 (5.6)   | 2 (2.8)   | 2 (2.8)  | 0 (0.0) |   |
| <b>Subgroup with completed fertility</b>                          |                                  |                     |                              |           |           |           |          |         |   |
| All subjects                                                      | 33                               | 9 (27.3)            | 24 (72.7)                    | 2 (6.1)   | 4 (12.1)  | 1 (3.0)   | 2 (6.1)  | 0 (0.0) |   |
| Males                                                             | 16                               | 3 (18.8)            | 13 (81.2)                    | 1 (6.2)   | 2 (12.5)  | 0 (0.0)   | 0 (0.0)  | 0 (0.0) |   |
| Females                                                           | 17                               | 6 (35.3)            | 11 (64.7)                    | 1 (5.9)   | 2 (11.8)  | 1 (5.9)   | 2 (11.8) | 0 (0.0) |   |
| <b>Subgroup with neither mental retardation nor schizophrenia</b> |                                  |                     |                              |           |           |           |          |         |   |
| All subjects                                                      | 53                               | 16 (30.2)           | 37 (69.8)                    | 7 (13.2)  | 6 (11.3)  | 2 (3.8)   | 1 (1.9)  | 0 (0.0) |   |
| Males                                                             | 27                               | 4 (14.8)            | 23 (85.2)                    | 1 (3.7)   | 3 (11.1)  | 0 (0.0)   | 0 (0.0)  | 0 (0.0) |   |
| Females                                                           | 26                               | 12 (46.2)           | 14 (53.8)                    | 6 (23.1)  | 3 (11.5)  | 2 (7.7)   | 1 (3.8)  | 0 (0.0) |   |
|                                                                   | <b>Unaffected siblings</b>       |                     |                              |           |           |           |          |         |   |
|                                                                   | Total                            | Subjects with child | Number of liveborn offspring |           |           |           |          |         | 5 |
|                                                                   |                                  |                     | 0                            | 1         | 2         | 3         | 4        |         |   |
| n                                                                 | n (%)                            | n (%)               | n (%)                        | n (%)     | n (%)     | n (%)     | n (%)    | n (%)   |   |
| All subjects                                                      | 200                              | 89 (44.5)           | 111 (55.5)                   | 29 (14.5) | 33 (16.5) | 20 (10.0) | 5 (2.5)  | 2 (1.0) |   |
| Males                                                             | 96                               | 40 (41.7)           | 56 (58.3)                    | 15 (15.6) | 12 (12.5) | 10 (10.4) | 3 (3.1)  | 0 (0.0) |   |
| Females                                                           | 104                              | 49 (47.1)           | 55 (52.9)                    | 14 (13.5) | 21 (20.2) | 10 (9.6)  | 2 (1.9)  | 2 (1.9) |   |
| <b>Subgroup with completed fertility</b>                          |                                  |                     |                              |           |           |           |          |         |   |
| All subjects                                                      | 48                               | 33 (68.8)           | 15 (31.2)                    | 8 (16.7)  | 14 (29.2) | 8 (16.7)  | 2 (4.2)  | 1 (2.1) |   |
| Males                                                             | 27                               | 17 (63.0)           | 10 (37.0)                    | 3 (11.1)  | 8 (29.6)  | 4 (14.8)  | 2 (7.4)  | 0 (0.0) |   |
| Females                                                           | 21                               | 16 (76.2)           | 5 (23.8)                     | 5 (23.8)  | 6 (28.6)  | 4 (19.0)  | 0 (0.0)  | 1 (4.8) |   |
| <b>Subgroup with neither mental retardation nor schizophrenia</b> |                                  |                     |                              |           |           |           |          |         |   |
| All subjects                                                      | 195                              | 87 (44.6)           | 108 (55.4)                   | 28 (14.4) | 32 (16.4) | 20 (10.3) | 5 (2.6)  | 2 (1.0) |   |
| Males                                                             | 95                               | 39 (41.1)           | 56 (58.9)                    | 14 (14.7) | 12 (12.6) | 10 (10.5) | 3 (3.2)  | 0 (0.0) |   |
| Females                                                           | 100                              | 48 (48.0)           | 52 (52.0)                    | 14 (14.0) | 20 (20.0) | 10 (10.0) | 2 (2.0)  | 2 (2.0) |   |
